# Supplementary material
Source: publisher figshare collection journal article supplement (https://geolsoc.figshare.com/ndownloader/files/29000420)
Supplement: Supplementary file 1 [file 29000420]

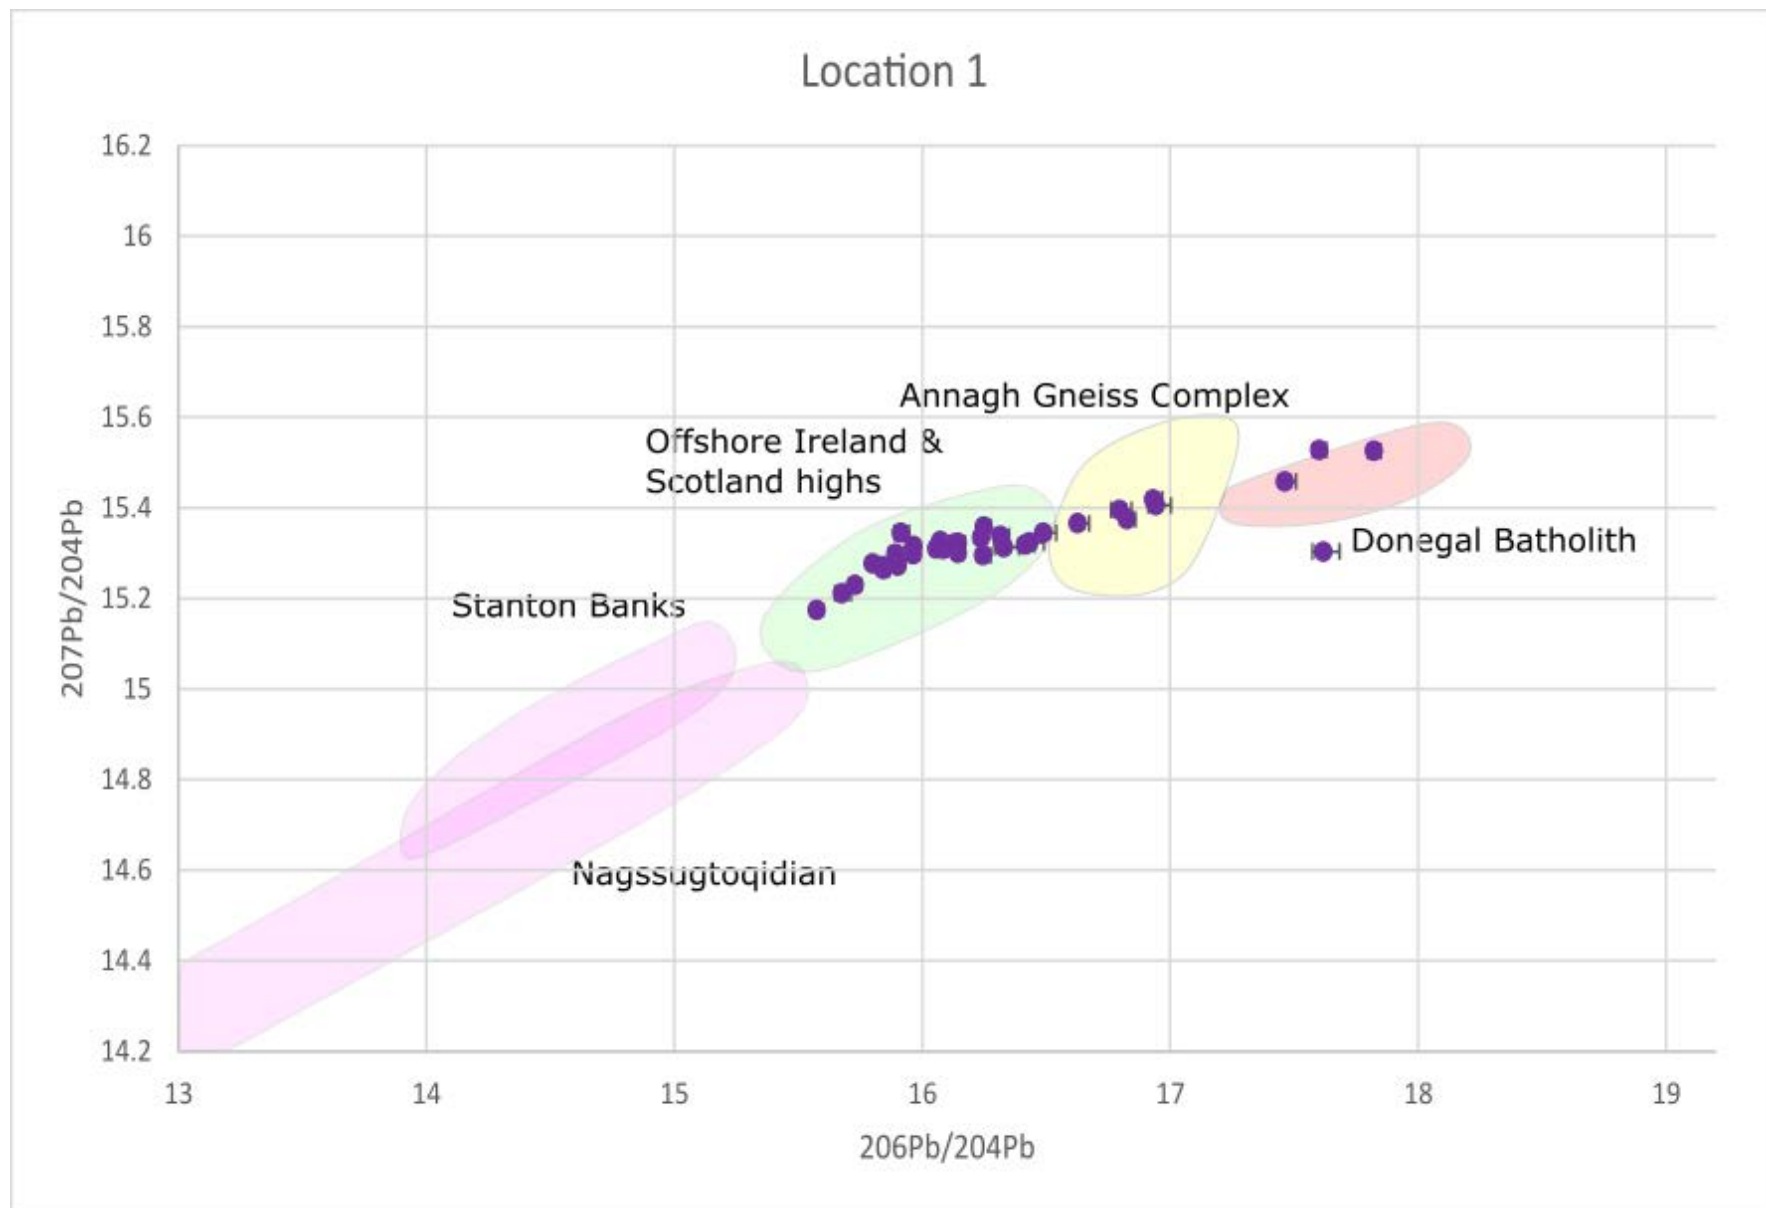

SD1: Pb isotopic ratios of K-feldspar for individual locations. Error bars are indicated on data points. Potential source domains are represented as coloured polygons.

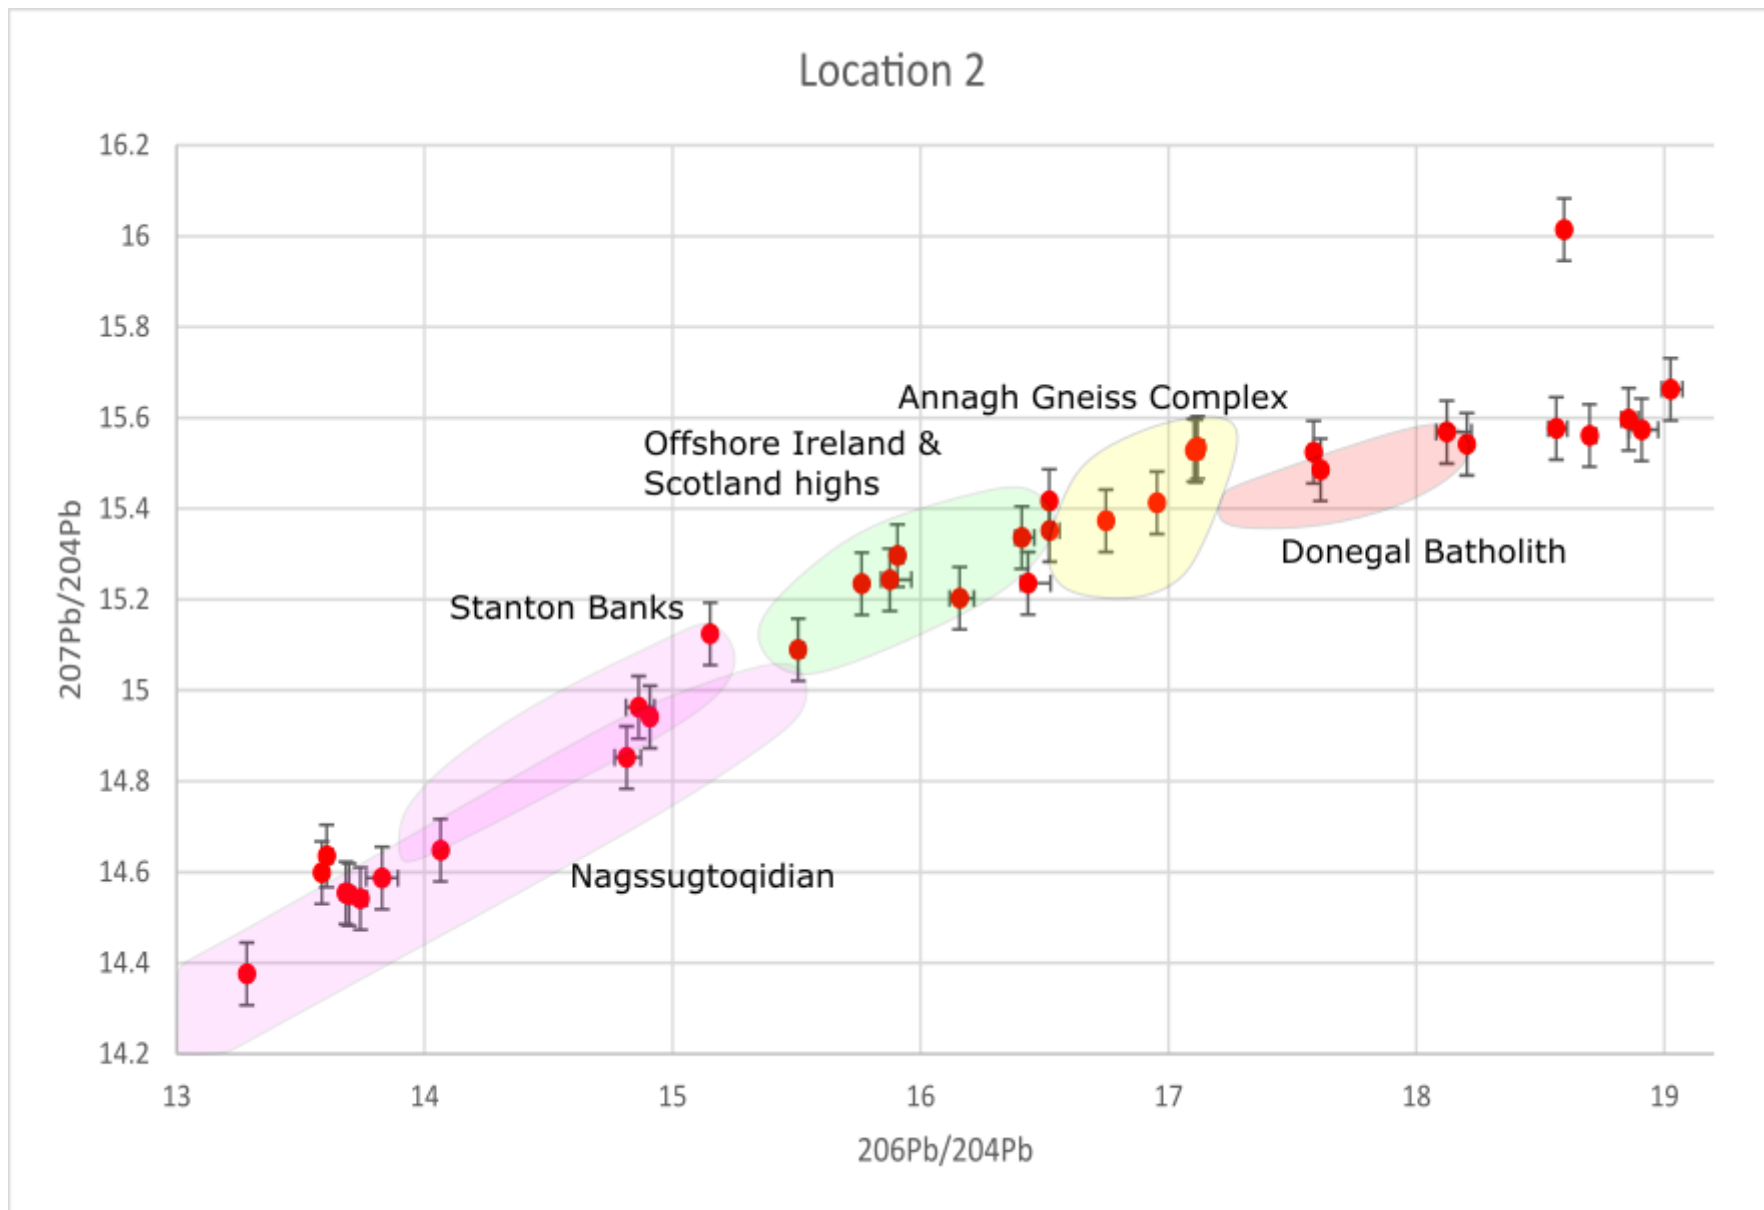

*SD2: Pb isotopic ratios of K-feldspar for individual locations. Error bars are indicated on data points. Potential source domains are represented as coloured polygons.*

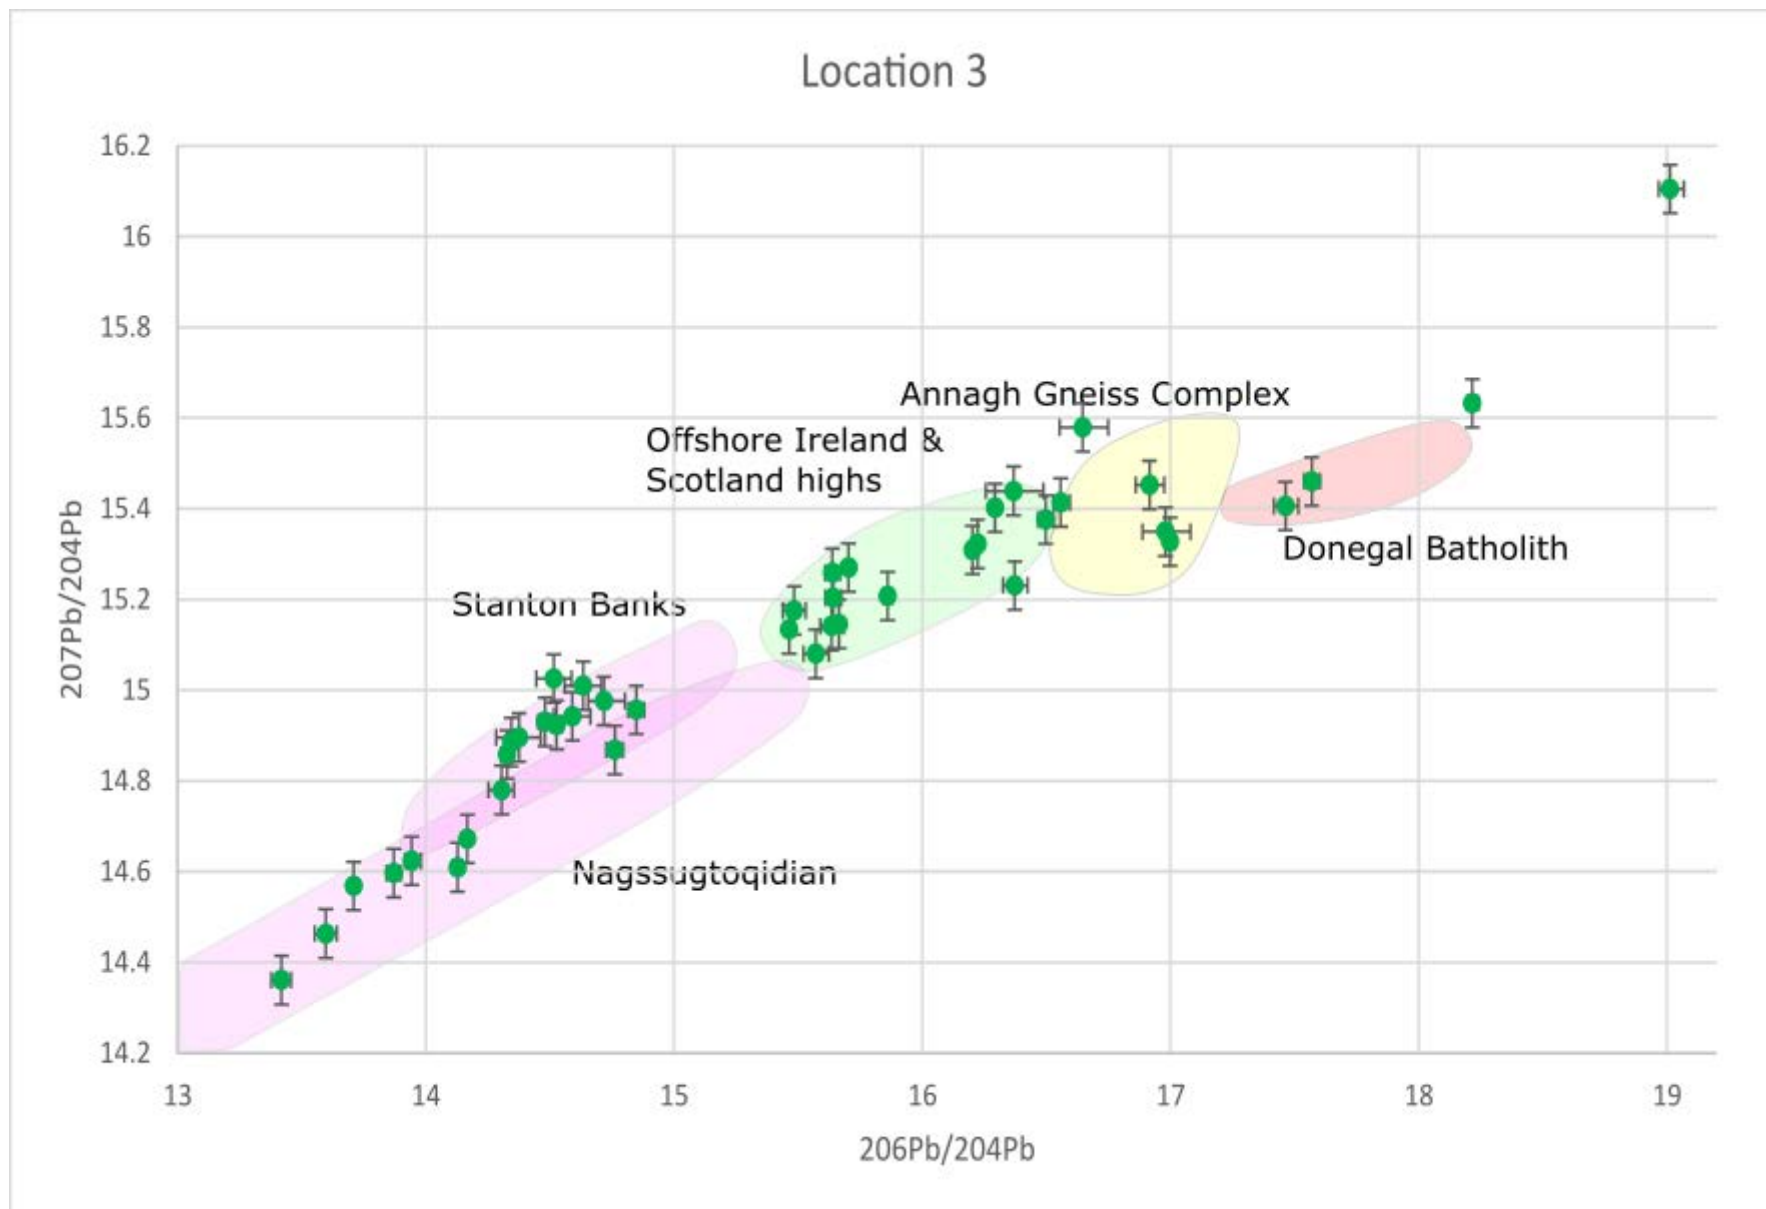

SD3: Pb isotopic ratios of K-feldspar for individual locations. Error bars are indicated on data points. Potential source domains are represented as coloured polygons.

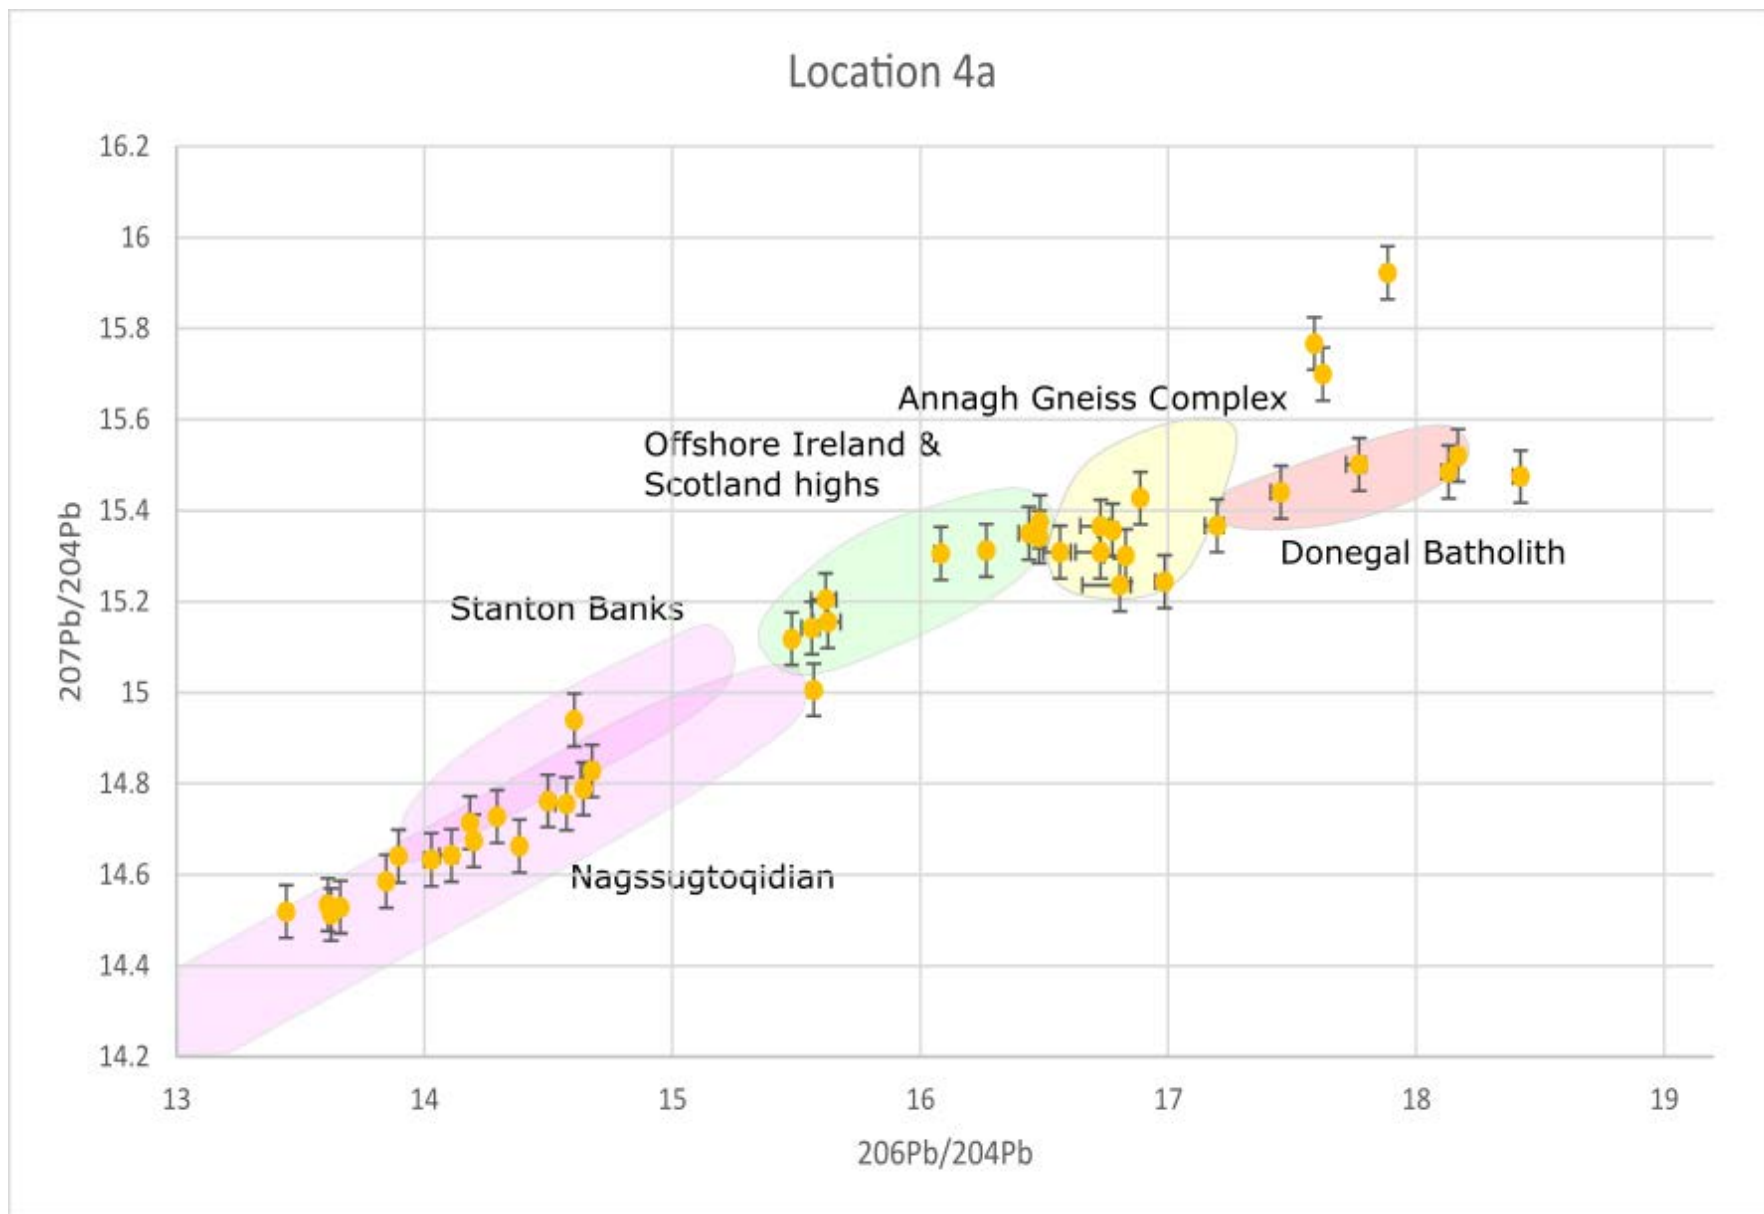

SD4: Pb isotopic ratios of K-feldspar for individual locations. Error bars are indicated on data points. Potential source domains are represented as coloured polygons.

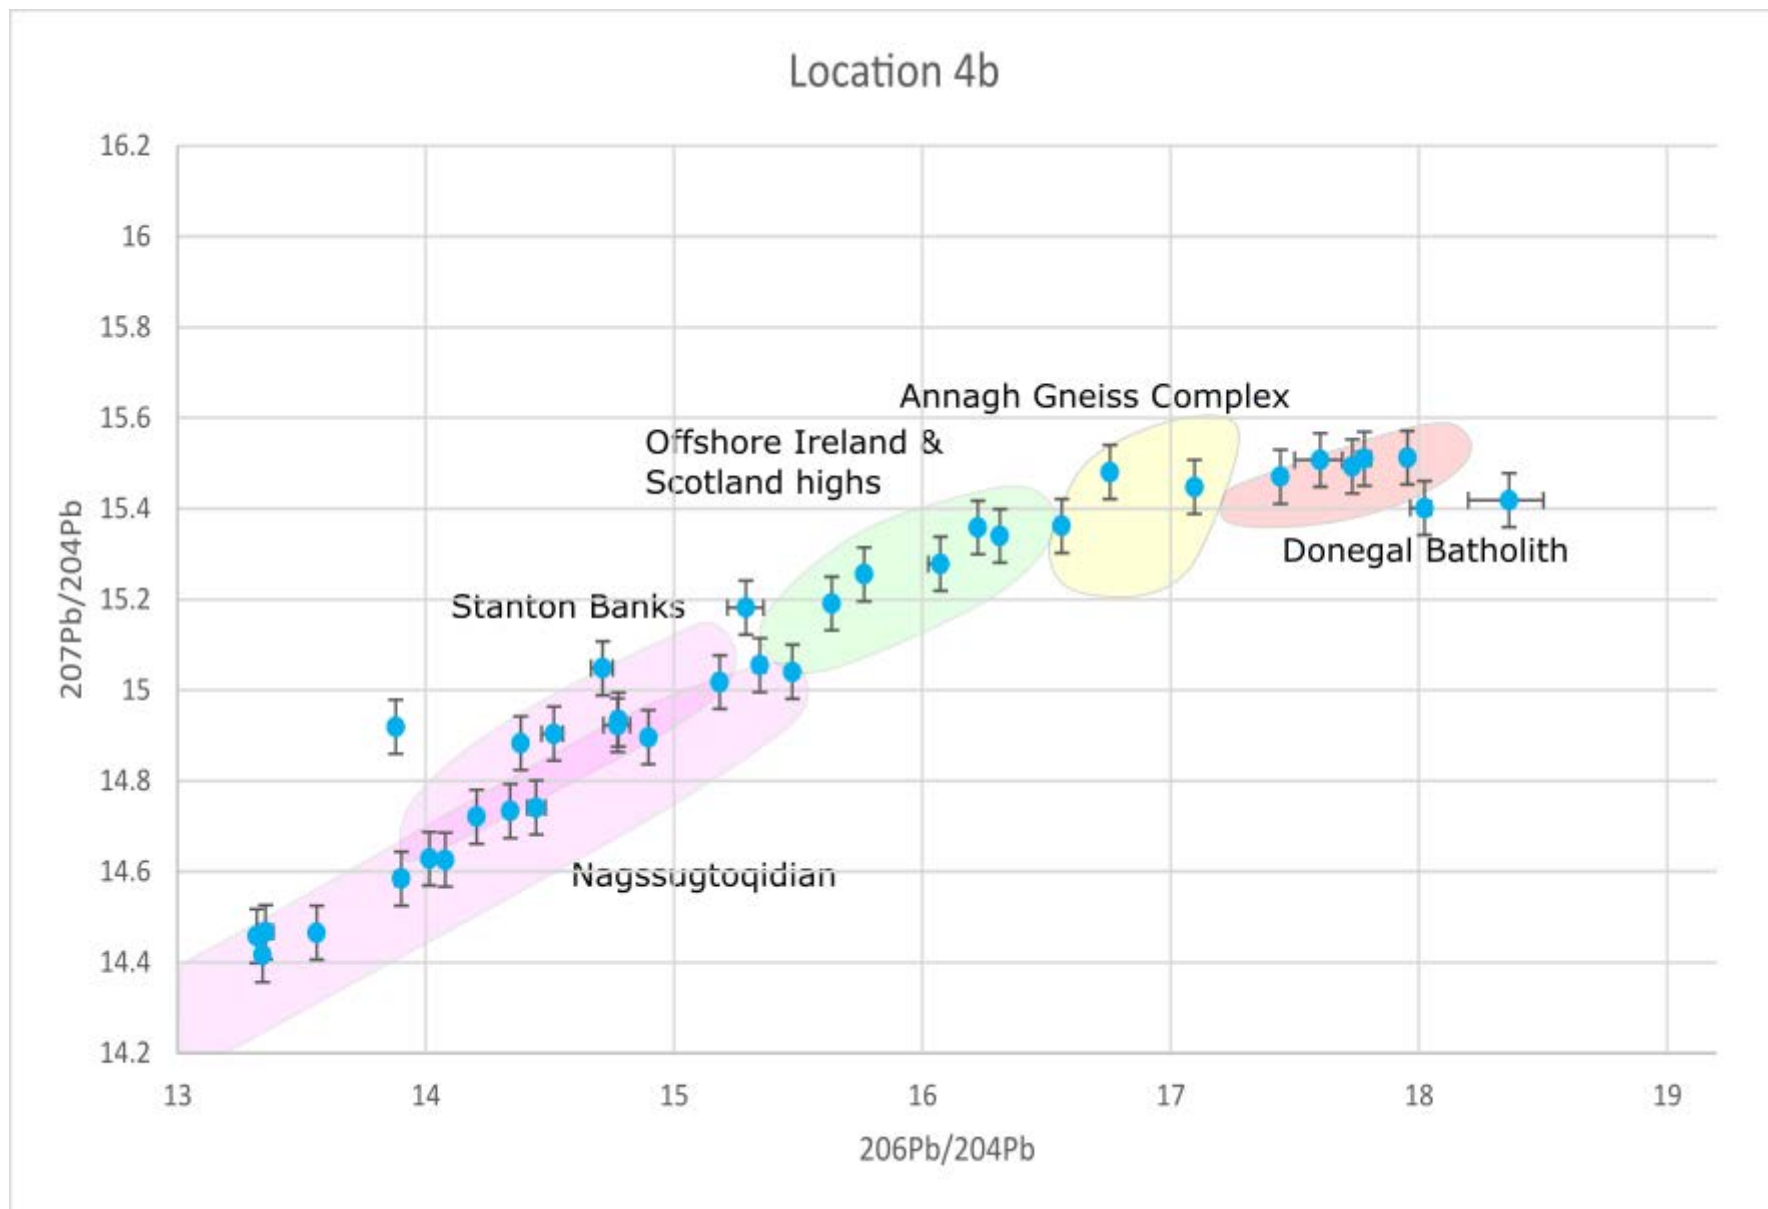

SD5: Pb isotopic ratios of K-feldspar for individual locations. Error bars are indicated on data points. Potential source domains are represented as coloured polygons.
